# Supplementary material
Source: PubMed Central journal article supplement (PMC10492638)

**Supplementary Table S1. Baseline patient and tumor characteristics according to Cmin REGO at C1**

|                                   | <b>Cmin REGO C1<br/>&lt;median<br/>(n=17)</b> |          | <b>Cmin REGO<br/>C1≥median<br/>(n=17)</b> |          | <b>p-value</b> |
|-----------------------------------|-----------------------------------------------|----------|-------------------------------------------|----------|----------------|
|                                   | <b>n</b>                                      | <b>%</b> | <b>n</b>                                  | <b>%</b> |                |
| <b>Gender</b>                     |                                               |          |                                           |          | 1              |
| Male                              | 10                                            | 58.82    | 10                                        | 58.82    |                |
| Female                            | 7                                             | 41.18    | 7                                         | 41.18    |                |
| <b>Age, y</b>                     |                                               |          |                                           |          | 0.5582         |
| Mean ± SD                         | 61.52 ± 9.14                                  |          | 58.81 ± 10.44                             |          |                |
| Min-max                           | 44.74-76.20                                   |          | 36.20-70.80                               |          |                |
| <b>Primary tumor resected</b>     |                                               |          |                                           |          | 0.4729         |
| No                                | 10                                            | 58.82    | 12                                        | 70.59    |                |
| Yes                               | 7                                             | 41.18    | 5                                         | 29.41    |                |
| <b>Sidedness</b>                  |                                               |          |                                           |          | 0.1026         |
| Right                             | 0                                             | 0        | 4                                         | 23.53    |                |
| Left                              |                                               |          |                                           |          |                |
| +Rectosigmoid                     | 17                                            | 100.00   | 13                                        | 76.47    |                |
| <b>Grade at initial diagnosis</b> |                                               |          |                                           |          | 0.7909         |
| 1                                 | 4                                             | 26.67    | 6                                         | 40.00    |                |
| 2                                 | 8                                             | 53.33    | 7                                         | 46.67    |                |
| 3                                 | 3                                             | 20.00    | 2                                         | 13.33    |                |
| Missing                           | 2                                             |          | 2                                         |          |                |
| <b>Stage at initial diagnosis</b> |                                               |          |                                           |          | 1              |
| I                                 | 0                                             | 0        | 1                                         | 5.88     |                |
| II                                | 1                                             | 5.88     | 0                                         | 0        |                |
| III                               | 5                                             | 29.41    | 4                                         | 23.53    |                |
| IV                                | 11                                            | 64.71    | 12                                        | 70.59    |                |
| <b>Number of metastatic sites</b> |                                               |          |                                           |          | 1              |

|                           |              |    |       |    |       |        |
|---------------------------|--------------|----|-------|----|-------|--------|
|                           | 1            | 3  | 17.65 | 3  | 17.65 |        |
|                           | ≥2           | 14 | 82.35 | 14 | 82.35 |        |
| <b>Metastatic sites</b>   |              |    |       |    |       |        |
|                           | Liver        | 16 | 94.12 | 13 | 76.47 | 0.3353 |
|                           | Lung         | 12 | 70.59 | 14 | 82.35 | 0.688  |
|                           | Lymph nodes  | 4  | 23.53 | 8  | 47.06 | 0.2818 |
|                           | Peritoneal   | 3  | 17.65 | 4  | 23.53 | 1      |
|                           | Bone         | 2  | 11.76 | 1  | 5.88  | 1      |
| <b>KRAS</b>               |              |    |       |    |       |        |
|                           | Wild-type    | 14 | 82.35 | 11 | 64.71 | 0.4384 |
|                           | Mutated      | 3  | 17.65 | 6  | 35.29 |        |
| <b>NRAS</b>               |              |    |       |    |       |        |
|                           | Wild-type    | 12 | 85.71 | 12 | 92.31 | 0.8756 |
|                           | Mutated      | 2  | 14.29 | 1  | 7.69  |        |
|                           | Missing      | 3  |       | 3  |       |        |
| <b>BRAF</b>               |              |    |       |    |       |        |
|                           | Wild type    | 14 | 87.50 | 12 | 85.71 | 1      |
|                           | Mutated      | 2  | 12.50 | 2  | 14.29 |        |
|                           | Missing      | 1  |       | 3  |       |        |
| <b>C-reactive protein</b> |              |    |       |    |       |        |
|                           | Out of range | 10 | 58.82 | 14 | 82.35 | 0.2587 |
|                           | Normal       | 7  | 41.18 | 3  | 17.65 |        |
| <b>Albumin</b>            |              |    |       |    |       |        |
|                           | Out of range | 7  | 41.18 | 2  | 11.76 | 0.1175 |
|                           | Normal       | 10 | 58.82 | 15 | 88.24 |        |

**Supplementary Table S2.** Correlation between the M-2 C2 and C1 accumulation ratio and Csum (REGO+M-2+M-5)

|                                    | <b>M-2 C2/C1 ratio</b> |                |             |             |               |             |             |             |             |
|------------------------------------|------------------------|----------------|-------------|-------------|---------------|-------------|-------------|-------------|-------------|
|                                    | <b>N</b>               | <b>Missing</b> | <b>Mean</b> | <b>SD</b>   | <b>Median</b> | <b>Q1</b>   | <b>Q3</b>   | <b>Min</b>  | <b>Max</b>  |
| <b>Csum C1 &lt; 2.5 mg/L</b>       | <b>7</b>               | <b>2</b>       | <b>2.04</b> | <b>1,62</b> | <b>2.25</b>   | <b>0.67</b> | <b>2.35</b> | <b>0.44</b> | <b>4.46</b> |
| <b>2.5 ≥ Csum C1 &lt; 5.5 mg/L</b> | <b>12</b>              | <b>0</b>       | <b>1.33</b> | <b>0.79</b> | <b>1.38</b>   | <b>0.60</b> | <b>1.91</b> | <b>0.28</b> | <b>2.51</b> |
| <b>Csum C1 ≥ 5.5 mg/L</b>          | <b>15</b>              | <b>6</b>       | <b>0.66</b> | <b>0.33</b> | <b>0.70</b>   | <b>0.31</b> | <b>0.76</b> | <b>0.23</b> | <b>1.17</b> |

**Abbreviations:** Csum, Concentration sum of regorafenib, M-2, and M-5 trough concentrations

**Supplementary Table 3.** RECIST 1.1 assessment according to Csum (REGO+M-2+M-5) ranges at C1 and C2 in the overall TEXCAN population

Patients with clinical progressive disease and/or missing radiological assessment at 4W or 8W has been considered as progressive. Concentrations are in mg/L

**A. Best overall response and control rate at week 8 according to C1 Csum**

| Best overall response               | C1 Csum  |              |           |              |           |              |           |              |
|-------------------------------------|----------|--------------|-----------|--------------|-----------|--------------|-----------|--------------|
|                                     | < 2.5    |              | 2.5-5.5   |              | ≥ 5.5     |              | Missing   |              |
|                                     | n        | %            | N         | %            | n         | %            | n         | %            |
| Stable disease                      | 5        | 71.43        | 12        | 100.00       | 11        | 73.33        | 14        | 66.67        |
| Progressive disease                 | 2        | 28.57        | 0         | 0            | 4         | 26.67        | 7         | 33.33        |
| <b>Total</b>                        | <b>7</b> | <b>12.73</b> | <b>12</b> | <b>21.82</b> | <b>15</b> | <b>27.27</b> | <b>21</b> | <b>38.18</b> |
| <b>Frequency Missing = 0</b> P=0.17 |          |              |           |              |           |              |           |              |

| Control rate at week 8              | C1 Csum  |              |           |              |           |              |           |              |
|-------------------------------------|----------|--------------|-----------|--------------|-----------|--------------|-----------|--------------|
|                                     | < 2.5    |              | 2.5-5.5   |              | ≥ 5.5     |              | Missing   |              |
|                                     | n        | %            | N         | %            | n         | %            | n         | %            |
| Stable disease                      | 4        | 57.14        | 6         | 50.00        | 5         | 33.33        | 5         | 23.81        |
| Progressive disease                 | 3        | 42.86        | 6         | 50.00        | 10        | 66.67        | 16        | 76.19        |
| <b>Total</b>                        | <b>7</b> | <b>12.73</b> | <b>12</b> | <b>21.82</b> | <b>15</b> | <b>27.27</b> | <b>21</b> | <b>38.18</b> |
| <b>Frequency Missing = 0</b> P=0.27 |          |              |           |              |           |              |           |              |

**Abbreviations:** Csum, Concentration sum of regorafenib, M-2, and M-5 trough concentrations

**B. Best overall response and control rate at 8 weeks according to C1 Csum and subsequent Csum assessment at C2**

In the TEXCAN clinical trial patients had a CT scan at 4W and 8W. Best overall response corresponds to best CT scan result between 4W and 8W.

| C1 Csum   | Best overall response | Subsequent C2 Csum | 8W radiologic assessment |
|-----------|-----------------------|--------------------|--------------------------|
| <2.5 mg/L | SD=71.43%<br>(5/7)    | <2.5 mg/L          | SD=50% (1/2)             |
|           |                       | ≥2.5 and <5.5 mg/L | SD=100% (3/3)            |

|                              |                      |                              |                 |
|------------------------------|----------------------|------------------------------|-----------------|
|                              |                      | <b>≥5.5 mg/L</b>             | NA              |
|                              |                      | <b>Unknown</b>               | SD=0% (0/2)     |
| <b>≥2.5 and &lt;5.5 mg/L</b> | SD=100%<br>(12/12)   | <b>&lt;2.5 mg/L</b>          | SD=50% (1/2)    |
|                              |                      | <b>≥2.5 and &lt;5.5 mg/L</b> | SD=66.66% (2/3) |
|                              |                      | <b>≥5.5 mg/L</b>             | SD=42.86% (3/7) |
|                              |                      | <b>Unknown</b>               | NA              |
| <b>≥5.5 mg/L</b>             | SD=73.33%<br>(11/15) | <b>&lt;2.5 mg/L</b>          | SD=0% (0/1)     |
|                              |                      | <b>≥2.5 and &lt;5.5 mg/L</b> | SD=66.67% (2/3) |
|                              |                      | <b>≥5.5 mg/L</b>             | SD=60% (3/5)    |
|                              |                      | <b>Unknown</b>               | SD=0% (0/6)     |
| <b>Unknown</b>               | SD=66.67%<br>(14/21) | <b>&lt;2.5 mg/L</b>          | NA              |
|                              |                      | <b>≥2.5 and &lt;5.5 mg/L</b> | SD=100% (1/1)   |
|                              |                      | <b>≥5.5 mg/L</b>             | NA              |
|                              |                      | <b>Unknown</b>               | SD=20% (4/20)   |

**Supplementary Table 4.** Toxicities according to Csum (REGO+M-2+M-5)

Concentrations are in mg/L

| At least one grade $\geq 3$ adverse event | Csum C1 |       |         |       |            |       |         |       | p=0.5540 |
|-------------------------------------------|---------|-------|---------|-------|------------|-------|---------|-------|----------|
|                                           | < 2.5   |       | 2.5-5.5 |       | $\geq 5.5$ |       | Missing |       |          |
|                                           | n       | %     | n       | %     | n          | %     | n       | %     |          |
| No                                        | 0       | 0     | 3       | 25    | 6          | 42.86 | 6       | 28.57 |          |
| Yes                                       | 7       | 100   | 9       | 75    | 8          | 57.14 | 15      | 71.43 |          |
| <b>Total</b>                              | 7       | 12.96 | 12      | 22.22 | 14         | 25.93 | 21      | 38.89 |          |

Frequency Missing = 1

| SAE at C1 or C2 | Csum C1 |       |         |        |            |       |         |       | p=0.1157 |
|-----------------|---------|-------|---------|--------|------------|-------|---------|-------|----------|
|                 | < 2.5   |       | 2.5-5.5 |        | $\geq 5.5$ |       | Missing |       |          |
|                 | n       | %     | n       | %      | n          | %     | n       | %     |          |
| No              | 4       | 57.14 | 12      | 100.00 | 12         | 80.00 | 16      | 76.19 |          |
| Yes             | 3       | 42.86 | 0       | 0      | 3          | 20.00 | 5       | 23.81 |          |
| <b>Total</b>    | 7       | 12.73 | 12      | 21.82  | 15         | 27.27 | 21      | 38.18 |          |

**Abbreviations:** Csum, Concentration sum of regorafenib, M-2, and M-5 trough concentrations

**Supplementary Table 5.** Dose modifications and treatment interruptions according to Csum (REGO+M-2+M-5) at C1 and C2

Concentrations are in mg/L

| Dose modifications | Csum C1 |       |         |       |       |    |         |      |
|--------------------|---------|-------|---------|-------|-------|----|---------|------|
|                    | < 2.5   |       | 2.5-5.5 |       | ≥ 5.5 |    | Missing |      |
|                    | n       | %     | n       | %     | n     | %  | n       | %    |
| No                 | 4       | 57.14 | 10      | 83.33 | 12    | 80 | 13      | 61.9 |
| Yes                | 3       | 42.86 | 2       | 16.67 | 3     | 20 | 8       | 38.1 |

p=0.4482

| Treatment interruptions or discontinuations | Csum C1 |       |         |       |        |       |         |      |
|---------------------------------------------|---------|-------|---------|-------|--------|-------|---------|------|
|                                             | < 2.5   |       | 2.5-5.5 |       | > =5.5 |       | Missing |      |
|                                             | n       | %     | n       | %     | n      | %     | n       | %    |
| No                                          | 3       | 42.86 | 11      | 91.67 | 12     | 80.00 | 8       | 38.1 |
| Yes                                         | 4       | 57.14 | 1       | 8.33  | 3      | 20.00 | 13      | 61.9 |

p=0.0043

| Csum C1           | Cumulative dose of REGO at C1 |         |         |        |      |      |      |      |
|-------------------|-------------------------------|---------|---------|--------|------|------|------|------|
|                   | N                             | Mean    | SD      | Median | Q1   | Q3   | Min  | Max  |
| Csum < 2.5 mg/L   | 7                             | 2542.86 | 804.27  | 2400   | 1800 | 3360 | 1560 | 3360 |
| Csum 2.5-5.5 mg/L | 12                            | 3123.33 | 386.86  | 3360   | 2880 | 3360 | 2280 | 3360 |
| Csum ≥ 5.5 mg/L   | 15                            | 3136.00 | 395.34  | 3360   | 3080 | 3360 | 2240 | 3360 |
| PK Missing        | 21                            | 2354.29 | 1021.79 | 2480   | 1600 | 3360 | 480  | 3360 |

p=0.051

**Abbreviations:** Csum, Concentration sum of regorafenib, M-2, and M-5 trough concentrations; REGO, regorafenib; PK, pharmacokinetic

|  | Csum C2  |
|--|----------|
|  | p=0.3995 |

| Dose modifications | <2.5 |       | 2.5-5.5 |    | ≥5.5 |       | missing |       |
|--------------------|------|-------|---------|----|------|-------|---------|-------|
|                    | n    | %     | n       | %  | n    | %     | n       | %     |
| No                 | 2    | 33.33 | 9       | 75 | 6    | 54.55 | 7       | 63.64 |
| Yes                | 4    | 66.67 | 3       | 25 | 5    | 45.45 | 4       | 36.36 |

| Treatment interruptions or discontinuations | Csum C2 |       |         |       |       |       |         |       |
|---------------------------------------------|---------|-------|---------|-------|-------|-------|---------|-------|
|                                             | < 2.5   |       | 2.5-5.5 |       | ≥ 5.5 |       | Missing |       |
|                                             | n       | %     | n       | %     | n     | %     | n       | %     |
| No                                          | 4       | 66.67 | 11      | 91.67 | 8     | 72.73 | 6       | 54.55 |
| Yes                                         | 2       | 33.33 | 1       | 8.33  | 3     | 27.27 | 5       | 45.45 |

p=0.2289

| Csum C2      | Cumulative dose of REGO at C2 |         |        |        |      |      |      |      |
|--------------|-------------------------------|---------|--------|--------|------|------|------|------|
|              | N                             | Mean    | SD     | Median | Q1   | Q3   | Min  | Max  |
| Csum < 2.5   | 5                             | 2528.00 | 594.24 | 2520   | 2520 | 2560 | 1680 | 3360 |
| Csum 2.5-5.5 | 12                            | 2983.33 | 542.98 | 3300   | 2540 | 3360 | 1680 | 3360 |
| Csum ≥ 5.5   | 11                            | 2672.73 | 734.04 | 2520   | 2520 | 3360 | 840  | 3360 |
| PK Missing   | 11                            | 2341.82 | 889.83 | 2280   | 1440 | 3360 | 1200 | 3360 |

p=0.2673

**Abbreviations:** Csum, Concentration sum of regorafenib, M-2, and M-5 trough concentrations; REGO, regorafenib; PK, pharmacokinetic



**Supplementary table 6. Influence of sex and Body Max Index on regoragenib and metabolite exposure.**

Concentrations are in mg/L

6A. Impact of sex

|                | cycle1<br>(n=37) | Male<br>(n=22) | Female<br>(n=15) | pvalue        | cycle2<br>(n=37) | Male<br>(n=22) | Female<br>(n=15) | Pvalue |
|----------------|------------------|----------------|------------------|---------------|------------------|----------------|------------------|--------|
| <b>rego</b>    |                  |                |                  | 0.9442        |                  |                |                  | 0.9011 |
| <b>N</b>       | 34               | 20             | 14               |               | 27               | 17             | 10               |        |
| <b>missing</b> | 3                | 2              | 1                |               | 10               | 5              | 5                |        |
| <b>Mean</b>    | 2.1              | 2.1            | 2.1              |               | 2.1              | 2.02           | 2.25             |        |
| <b>Std Dev</b> | 1.17             | 1.13           | 1.27             |               | 1.36             | 1.05           | 1.82             |        |
| <b>Median</b>  | 1.985            | 1.95           | 1.99             |               | 1.9              | 1.91           | 1.66             |        |
| <b>q1-q3</b>   | 1,03-2,73        | 1,11-2,87      | 1,03-2,6         |               | 1,10-2,76        | 1,41-2,33      | 1,07-2,76        |        |
| <b>min-max</b> | 0,54-4,84        | 0,54-4,47      | 0,57-4,84        |               | 0,43-6,49        | 0,43-3,82      | 0,64-6,49        |        |
| <b>regoM2</b>  |                  |                |                  | 0.2858        |                  |                |                  | 0.3796 |
| <b>N</b>       | 34               | 20             | 14               |               | 27               | 17             | 10               |        |
| <b>missing</b> | 3                | 2              | 1                |               | 10               | 5              | 5                |        |
| <b>Mean</b>    | 1.69             | 1.54           | 1.9              |               | 1.52             | 1.44           | 1.66             |        |
| <b>Std Dev</b> | 1.01             | 1              | 1.02             |               | 0.91             | 0.98           | 0.8              |        |
| <b>Median</b>  | 1.436            | 1.34           | 1.97             |               | 1.294            | 1.04           | 1.55             |        |
| <b>q1-q3</b>   | 0,89-2,49        | 0,77-2,2       | 0,89-2,76        |               | 0,77-2,24        | 0,63-2,32      | 1,24-2,16        |        |
| <b>min-max</b> | 0,11-3,86        | 0,11-3,56      | 0,56-3,86        |               | 0,31-3,34        | 0,31-3,28      | 0,36-3,34        |        |
| <b>regoM5</b>  |                  |                |                  | <b>0.0209</b> |                  |                |                  | 0.1137 |
| <b>N</b>       | 34               | 20             | 14               |               | 27               | 17             | 10               |        |
| <b>missing</b> | 3                | 2              | 1                |               | 10               | 5              | 5                |        |
| <b>Mean</b>    | <b>1.72</b>      | <b>1.34</b>    | <b>2.26</b>      |               | 1.59             | 1.29           | 2.09             |        |
| <b>Std Dev</b> | 1.19             | 1.06           | 1.2              |               | 1.28             | 1.11           | 1.45             |        |
| <b>Median</b>  | 1.611            | 1.07           | 2.32             |               | 1.174            | 0.91           | 1.87             |        |
| <b>q1-q3</b>   | 0,79-2,37        | 0,57-1,83      | 1,5-2,85         |               | 0,45-2,42        | 0,41-1,8       | 0,95-2,56        |        |

|                |           |          |           |           |          |          |
|----------------|-----------|----------|-----------|-----------|----------|----------|
| <b>min-max</b> | 0,14-4,65 | 0,14-4,3 | 0,59-4,65 | 0,20-5,10 | 0,2-3,82 | 0,35-5,1 |
|----------------|-----------|----------|-----------|-----------|----------|----------|

6B. Impact of BMI

|                | <b>cycle1<br/>(n=37)</b> | <b>BMI&lt;25<br/>(n=23)</b> | <b>BMI&gt;=25<br/>(n=14)</b> | <b>pvalue*</b> | <b>cycle2<br/>(n=37)</b> | <b>BMI&lt;25<br/>(n=23)</b> | <b>BMI&gt;=25<br/>(n=14)</b> | <b>pvalue*</b> |
|----------------|--------------------------|-----------------------------|------------------------------|----------------|--------------------------|-----------------------------|------------------------------|----------------|
| <b>rego</b>    |                          |                             |                              | 0.9025         |                          |                             |                              | 0.029          |
| <b>N</b>       | 34                       | 20                          | 14                           |                | 27                       | 17                          | 10                           |                |
| <b>missing</b> | 3                        | 3                           | 0                            |                | 10                       | 6                           | 4                            |                |
| <b>Mean</b>    | 2.1                      | 2.06                        | 2.15                         |                | 2.1                      | 1.66                        | 2.85                         |                |
| <b>Std Dev</b> | 1.17                     | 1.14                        | 1.25                         |                | 1.36                     | 1                           | 1.6                          |                |
| <b>Median</b>  | 1.985                    | 1.83                        | 2.19                         |                | 1.9                      | 1.68                        | 2.25                         |                |
| <b>q1-q3</b>   | 1,03-2,73                | 1,12-2,63                   | 1,02-3,01                    |                | 1,10-2,76                | 0,73-1,91                   | 1,96-3,54                    |                |
| <b>min-max</b> | 0,54-4,84                | 0,57-4,47                   | 0,54-4,84                    |                | 0,43-6,49                | 0,43-3,82                   | 1,07-6,49                    |                |
| <b>regoM2</b>  |                          |                             |                              | 0.3359         |                          |                             |                              | 0.1833         |
| <b>N</b>       | 34                       | 20                          | 14                           |                | 27                       | 17                          | 10                           |                |
| <b>missing</b> | 3                        | 3                           | 0                            |                | 10                       | 6                           | 4                            |                |
| <b>Mean</b>    | 1.69                     | 1.84                        | 1.47                         |                | 1.52                     | 1.35                        | 1.82                         |                |
| <b>Std Dev</b> | 1.01                     | 1.02                        | 0.99                         |                | 0.91                     | 0.85                        | 0.98                         |                |
| <b>Median</b>  | 1.436                    | 1.73                        | 1.32                         |                | 1.294                    | 1.24                        | 1.97                         |                |
| <b>q1-q3</b>   | 0,89-2,49                | 0,99-2,57                   | 0,41-2,24                    |                | 0,77-2,24                | 0,77-1,57                   | 0,97-2,59                    |                |
| <b>min-max</b> | 0,11-3,86                | 0,47-3,86                   | 0,11-2,99                    |                | 0,31-3,34                | 0,31-3,28                   | 0,49-3,34                    |                |
| <b>regoM5</b>  |                          |                             |                              | 0.0662         |                          |                             |                              | 0.7441         |
| <b>N</b>       | 34                       | 20                          | 14                           |                | 27                       | 17                          | 10                           |                |
| <b>missing</b> | 3                        | 3                           | 0                            |                | 10                       | 6                           | 4                            |                |
| <b>Mean</b>    | 1.72                     | 2                           | 1.32                         |                | 1.59                     | 1.52                        | 1.7                          |                |
| <b>Std Dev</b> | 1.19                     | 1.18                        | 1.13                         |                | 1.28                     | 1.04                        | 1.67                         |                |
| <b>Median</b>  | 1.611                    | 1.9                         | 0.93                         |                | 1.174                    | 1.17                        | 1.25                         |                |
| <b>q1-q3</b>   | 0,79-2,37                | 1,07-2,56                   | 0,3-1,89                     |                | 0,45-2,42                | 0,73-2,29                   | 0,34-2,56                    |                |
| <b>min-max</b> | 0,14-4,65                | 0,46-4,65                   | 0,14-3,96                    |                | 0,20-5,10                | 0,31-3,7                    | 0,2-5,1                      |                |



Supplementary Figure 1. Flow chart of PK TEXCAN study

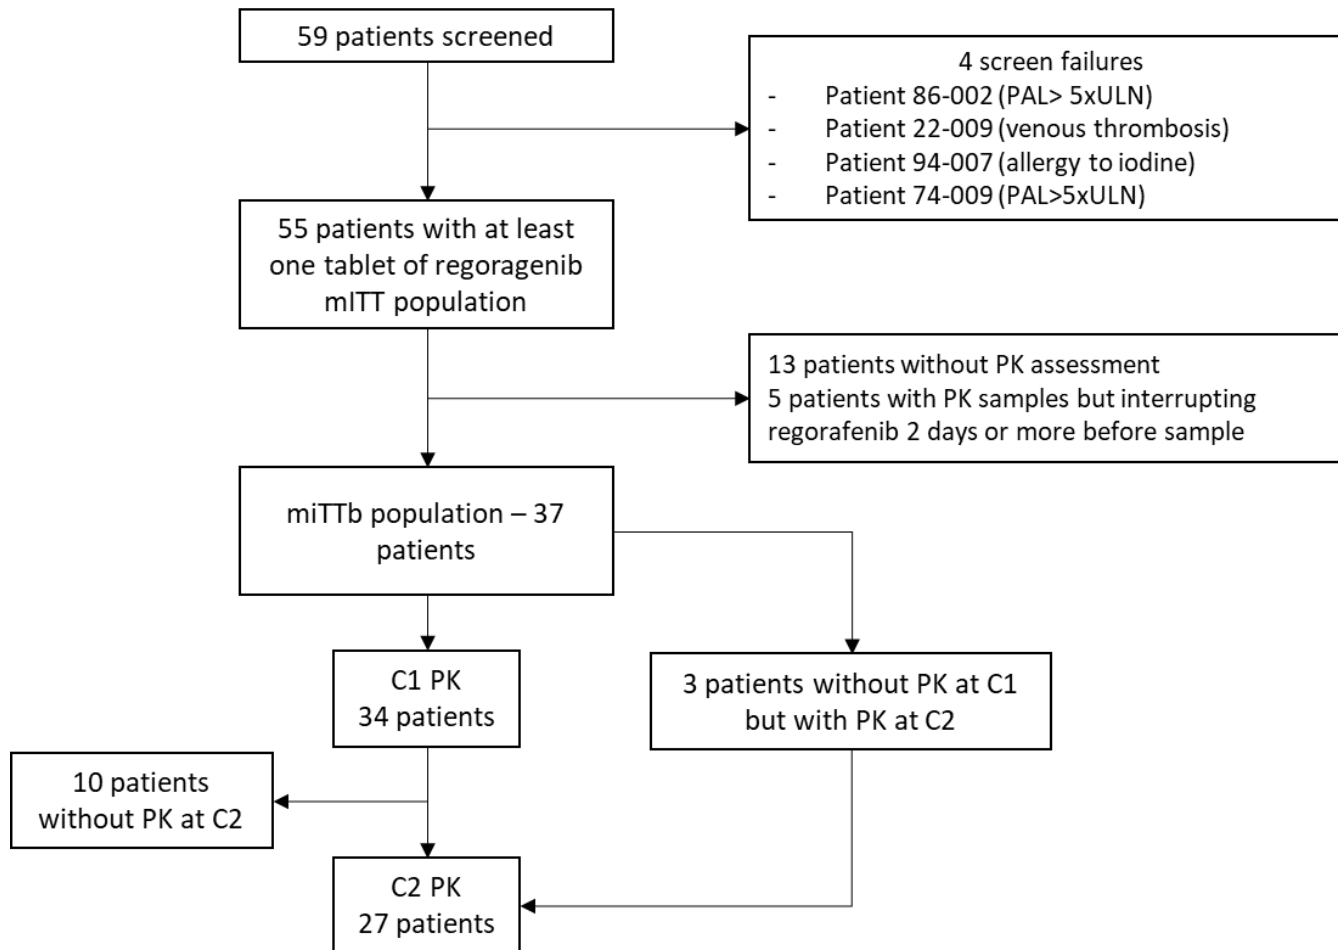

**Supplementary Figure 2.** OS in the whole TEXCAN mITT population (A) and in the PK mITTb population (B)

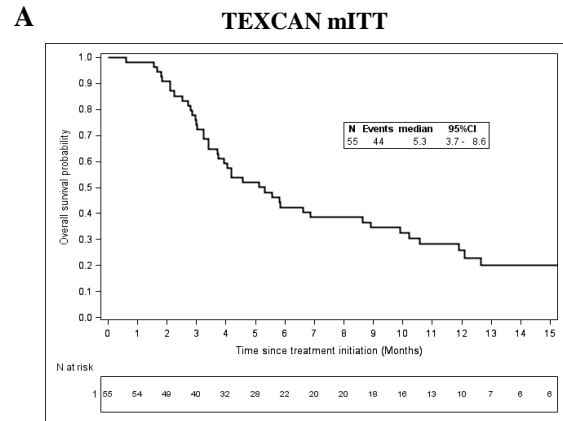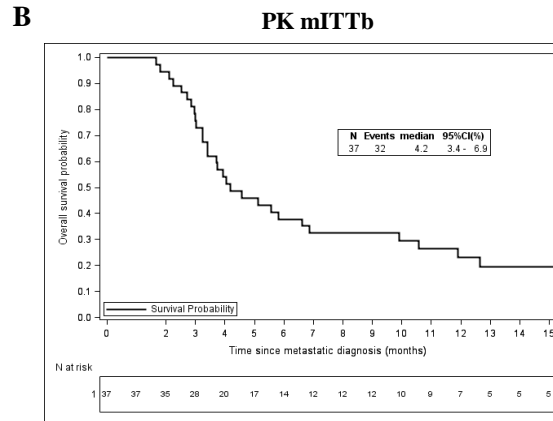



**Supplementary Figure S3. OS according to M-2 Cmin C1 (A) and M-5 Cmin C1 (B)**

**A**

**Cmin C1 of M-2 (median=1.44 mg/L)**

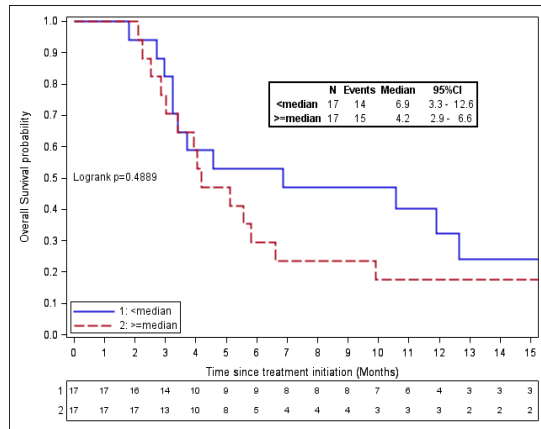

HR=1.30 (0.62-2.71); p-value=0.4913 (proportional risk hypothesis p=0.44)

**B**

**Cmin C1 of M-5 (median=1.61 mg/L)**

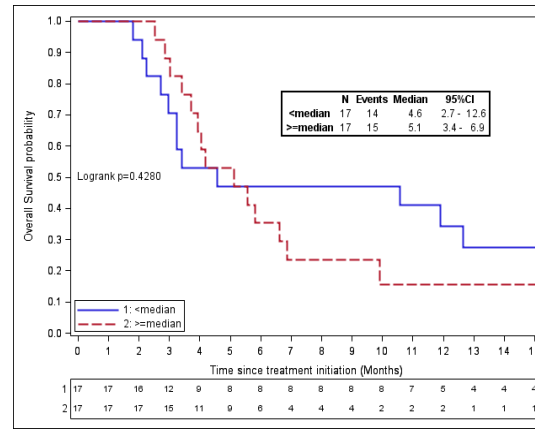

HR=ND (proportional risk hypothesis not valid p=0.025)





**Supplementary Figure S4. PFS according to PK parameters in the TEXCAN PK mITTb cohort**

**A Cmin C1 of REGO (median=1.99 mg/L)**

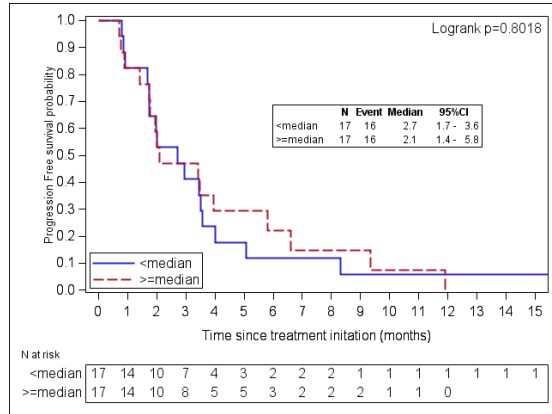

**B Cmin C1 of M-2 (median=1.44 mg/L)**

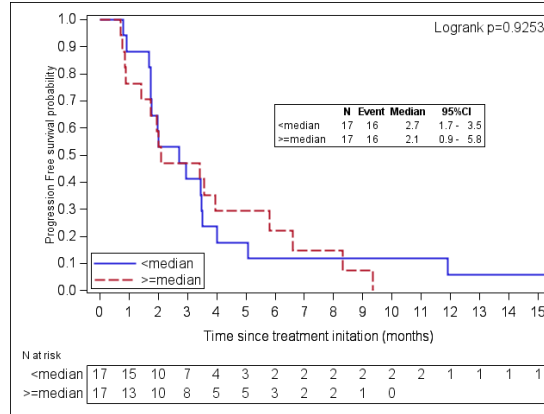

**C Cmin C1 of M-5 (median=1.61 mg/L)**

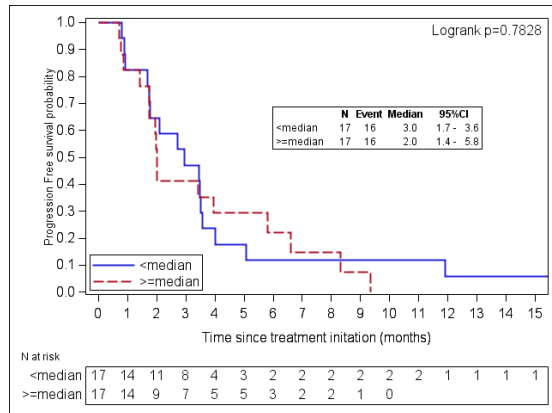

**D Accumulation ratio C2/C1 of M-2 (median=0.82)**

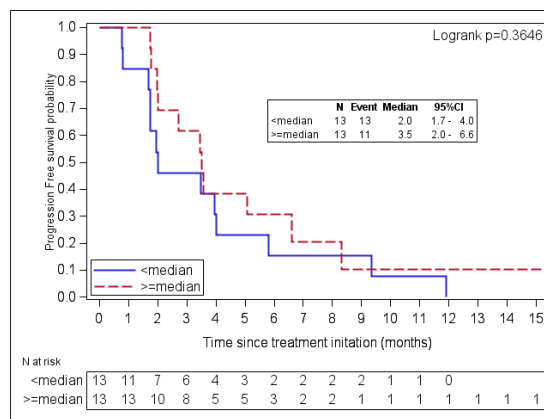

**E Accumulation ratio C2/C1 of M-5 (median=0.75)**

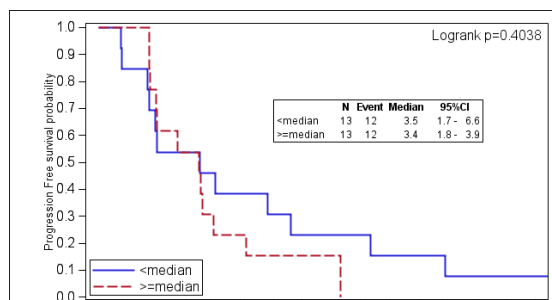

**F Csum C1 (REGO+M-2+M-5) range (mg/L)**

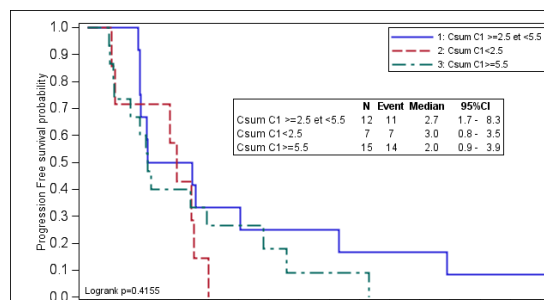

Supplement: NIHMS1920625-supplement-1.pdf [file NIHMS1920625-supplement-1.pdf]
